# Supplementary material for: Prospective genomic surveillance of methicillin-resistant Staphylococcus aureus (MRSA) associated with bloodstream infection, England, 1 October 2012 to 30 September 2013
Source: PubMed Central journal article supplement (PMC6351993; doi:10.2807/1560-7917.es.2019.24.4.1800215), 2019-01-24
Supplement: 1800215_TOLEMAN_SupplementaryFigureS1.pdf [file 1800215_TOLEMAN_SupplementaryFigureS1.pdf]

This supplementary material is hosted by *Eurosurveillance* as supporting information alongside the article 'Prospective genomic surveillance of methicillin-resistant *Staphylococcus aureus* (MRSA) associated with bloodstream infection, England, 1 October 2012 to 30 September 2013' on behalf of the authors who remain responsible for the accuracy and appropriateness of the content. The same standards for ethics, copyright, attributions and permissions as for the article apply. *Eurosurveillance* is not responsible for the maintenance of any links or email addresses provided therein.

Mandatory Enhanced Surveillance System

903 Cases of MRSA Bloodstream Infection Reported

Staphylococcal Reference Laboratory, Colindale

559 MRSA isolates Received

University of Cambridge/  
Wellcome Trust Sanger Institute

134 Isolates Excluded\*

425 Cases with Collated Genomic and Epidemiological Data
