# Supplementary material for: Prospective genomic surveillance of methicillin-resistant Staphylococcus aureus (MRSA) associated with bloodstream infection, England, 1 October 2012 to 30 September 2013
Source: PubMed Central journal article supplement (PMC6351993; doi:10.2807/1560-7917.es.2019.24.4.1800215), 2019-01-24
Supplement: 1800215_TOLEMAN_SupplementaryTableS1.pdf [file 1800215_TOLEMAN_SupplementaryTableS1.pdf]

|            |           |                                |         |    |           |         |        |    |        |    |        |    |        |    |        |    |      |    |      |
|------------|-----------|--------------------------------|---------|----|-----------|---------|--------|----|--------|----|--------|----|--------|----|--------|----|------|----|------|
| 12673_8_56 | ERR555055 | Scaffold: Velvet + Improvement | 2827916 | 44 | 64270.82  | 338338  | 158318 | 7  | 146445 | 8  | 125438 | 10 | 84648  | 13 | 39380  | 18 | 444  | 44 | 744  |
| 12673_8_68 | ERR555067 | Scaffold: Velvet + Improvement | 2882836 | 29 | 99408.14  | 505603  | 211932 | 4  | 154058 | 6  | 135768 | 7  | 97815  | 10 | 65984  | 14 | 473  | 29 | 1109 |
| 12673_8_69 | ERR555068 | Scaffold: Velvet + Improvement | 2798393 | 25 | 111935.72 | 409004  | 190333 | 5  | 170555 | 7  | 144132 | 9  | 124509 | 11 | 63334  | 14 | 620  | 25 | 272  |
| 12673_8_76 | ERR555075 | Scaffold: Velvet + Improvement | 2813559 | 60 | 46892.65  | 277173  | 156412 | 7  | 110270 | 9  | 104733 | 12 | 68211  | 15 | 37114  | 21 | 307  | 60 | 851  |
| 12673_8_51 | ERR555050 | Scaffold: Velvet + Improvement | 2816484 | 9  | 312942.67 | 1335735 | 544265 | 2  | 544265 | 2  | 531138 | 3  | 531138 | 3  | 172866 | 4  | 2572 | 9  | 2231 |
| 12673_8_52 | ERR555051 | Scaffold: Velvet + Improvement | 2778989 | 35 | 79399.69  | 400703  | 174169 | 6  | 128392 | 8  | 124645 | 10 | 87191  | 12 | 43578  | 17 | 442  | 35 | 810  |
| 12673_8_79 | ERR555078 | Scaffold: Velvet + Improvement | 2798664 | 42 | 66634.86  | 338698  | 125425 | 7  | 108274 | 10 | 98432  | 12 | 62772  | 16 | 41997  | 21 | 313  | 42 | 877  |
| 12673_8_80 | ERR555079 | Scaffold: Velvet + Improvement | 2746006 | 14 | 196143.29 | 971061  | 584611 | 2  | 382603 | 3  | 382603 | 3  | 353652 | 4  | 92327  | 6  | 428  | 14 | 1557 |
| 12673_8_81 | ERR555080 | Scaffold: Velvet + Improvement | 2825296 | 25 | 113011.84 | 893943  | 255709 | 3  | 243669 | 4  | 193002 | 5  | 121930 | 7  | 89854  | 9  | 368  | 25 | 889  |
| 12673_8_54 | ERR555053 | Scaffold: Velvet + Improvement | 2772753 | 13 | 213288.69 | 1291764 | 428796 | 2  | 428796 | 2  | 425606 | 3  | 226553 | 4  | 172833 | 5  | 396  | 13 | 2265 |
| 12673_8_57 | ERR555056 | Scaffold: Velvet + Improvement | 2833486 | 27 | 104943.93 | 406858  | 211675 | 5  | 170559 | 7  | 146549 | 8  | 108285 | 11 | 54696  | 14 | 444  | 27 | 1325 |
| 12673_8_58 | ERR555057 | Scaffold: Velvet + Improvement | 2737122 | 16 | 171070.12 | 766047  | 385595 | 3  | 325538 | 4  | 325538 | 4  | 143355 | 6  | 90260  | 8  | 371  | 16 | 308  |
| 12673_8_59 | ERR555058 | Scaffold: Velvet + Improvement | 2710636 | 16 | 169414.75 | 1299005 | 625334 | 2  | 625334 | 2  | 625334 | 2  | 140463 | 4  | 108559 | 6  | 600  | 16 | 519  |
| 12593_2_85 | ERR540972 | Scaffold: Velvet + Improvement | 2759201 | 28 | 98542.89  | 654828  | 174012 | 4  | 170550 | 5  | 139575 | 7  | 108885 | 10 | 59043  | 13 | 307  | 28 | 1299 |
| 12673_8_45 | ERR555044 | Scaffold: Velvet + Improvement | 2844311 | 35 | 81266.03  | 330651  | 166819 | 6  | 139476 | 8  | 125430 | 11 | 108902 | 13 | 52184  | 16 | 410  | 35 | 961  |
| 12673_8_46 | ERR555045 | Scaffold: Velvet + Improvement | 2990078 | 66 | 45304.21  | 291353  | 111034 | 10 | 77709  | 14 | 65134  | 18 | 49263  | 23 | 29498  | 30 | 305  | 66 | 2445 |
| 12673_8_48 | ERR555047 | Scaffold: Velvet + Improvement | 2786913 | 26 | 107188.96 | 446091  | 245293 | 4  | 176881 | 6  | 173986 | 7  | 130633 | 9  | 108236 | 11 | 516  | 26 | 3    |
| 12673_8_47 | ERR555046 | Scaffold: Velvet + Improvement | 2927433 | 34 | 86100.97  | 782091  | 298630 | 4  | 284707 | 5  | 129618 | 6  | 99154  | 9  | 86607  | 12 | 359  | 34 | 1166 |
| 12673_8_50 | ERR555049 | Scaffold: Velvet + Improvement | 2912386 | 46 | 63312.74  | 304400  | 150843 | 7  | 127663 | 9  | 98669  | 12 | 78495  | 15 | 39091  | 21 | 394  | 46 | 1425 |
| 12673_8_53 | ERR555052 | Scaffold: Velvet + Improvement | 2810797 | 54 | 52051.8   | 254996  | 120153 | 9  | 109656 | 11 | 91166  | 14 | 56704  | 18 | 39253  | 24 | 376  | 54 | 1615 |
| 12673_8_72 | ERR555071 | Scaffold: Velvet + Improvement | 2830164 | 43 | 65817.77  | 311105  | 146329 | 7  | 125426 | 9  | 108274 | 11 | 65519  | 15 | 43108  | 21 | 361  | 43 | 908  |
| 12673_8_73 | ERR555072 | Scaffold: Velvet + Improvement | 2786692 | 31 | 89893.29  | 444390  | 209377 | 5  | 156360 | 7  | 146334 | 8  | 108243 | 11 | 55731  | 14 | 447  | 31 | 974  |
| 12673_8_74 | ERR555073 | Scaffold: Velvet + Improvement | 2770516 | 36 | 76958.78  | 399519  | 134226 | 7  | 113872 | 9  | 96684  | 12 | 75391  | 15 | 50236  | 19 | 361  | 36 | 2445 |
| 12593_2_87 | ERR540974 | Scaffold: Velvet + Improvement | 2748159 | 26 | 105698.42 | 591719  | 174014 | 4  | 170566 | 5  | 131306 | 7  | 109105 | 9  | 87402  | 12 | 389  | 26 | 388  |
| 12593_2_88 | ERR540975 | Scaffold: Velvet + Improvement | 2863268 | 36 | 79535.22  | 386184  | 190191 | 5  | 156332 | 7  | 125427 | 9  | 67355  | 12 | 41126  | 17 | 439  | 36 | 1502 |
| 12593_2_89 | ERR540976 | Scaffold: Velvet + Improvement | 2890755 | 42 | 68827.5   | 335252  | 255227 | 5  | 146380 | 7  | 108297 | 10 | 55054  | 13 | 41236  | 19 | 400  | 42 | 948  |
| 12593_2_90 | ERR540977 | Scaffold: Velvet + Improvement | 2867185 | 39 | 73517.56  | 300290  | 170885 | 7  | 150885 | 8  | 85103  | 11 | 67664  | 14 | 50101  | 19 | 421  | 39 | 2102 |
| 12593_2_86 | ERR540973 | Scaffold: Velvet + Improvement | 2830337 | 36 | 78620.47  | 406473  | 168691 | 6  | 135478 | 8  | 108184 | 10 | 67016  | 13 | 41321  | 18 | 398  | 36 | 831  |
