# Supplementary material for: Prospective genomic surveillance of methicillin-resistant Staphylococcus aureus (MRSA) associated with bloodstream infection, England, 1 October 2012 to 30 September 2013
Source: PubMed Central journal article supplement (PMC6351993; doi:10.2807/1560-7917.es.2019.24.4.1800215), 2019-01-24
Supplement: 1800215_TOLEMAN_SupplementaryTableS2.pdf [file 1800215_TOLEMAN_SupplementaryTableS2.pdf]

Supplementary Table S2: Combined genomic and epidemiological data.

This supplementary material is hosted by Eurosurveillance as supporting information alongside the article 'Prospective genomic surveillance of methicillin-resistant *Staphylococcus aureus* (MRSA) associated with bloodstream infection, England, 1 October 2012 to 30 September 2013' on behalf of the authors who remain responsible for the accuracy and appropriateness of the content.

The same standards for ethics, copyright, attributions and permissions as for the article apply. Eurosurveillance is not responsible for the maintenance of any links or email addresses provided therein.

| Sample Details |                   |              |              |               | Laboratory Data |     |        |          |                             |
|----------------|-------------------|--------------|--------------|---------------|-----------------|-----|--------|----------|-----------------------------|
| Strain ID      | Year of Isolation | CC (genomic) | ST (genomic) | spa (genomic) | mecA            | PVL | spa    | Region   | Community or Hospital onset |
| 12483_8_74     | 2012              | 22           | 22           | t608          | 1               | 0   | t608   | EAST     | HO                          |
| 12483_8_17     | 2012              | 5            | 5            | t032          | 1               | 0   | t032   | S EAST   | HO                          |
| 12625_1_22     | 2012              | 5            | 5            | t548          | 1               | 0   | t548   | YORK&HUM | CO                          |
| 12483_8_71     | 2012              | 22           | 22           | t032          | 1               | 0   | t032   | W MIDS   | HO                          |
| 12625_1_23     | 2012              | 22           | 3742         | t906          | 1               | 0   | t906   | LONDON   | HO                          |
| 12625_1_20     | 2012              | 22           | 22           | t032          | 1               | 0   | t032   | YORK&HUM | CO                          |
| 12625_1_17     | 2012              | 22           | 22           | t032          | 1               | 0   | t032   | LONDON   | HO                          |
| 12483_8_73     | 2012              | 5            | 125          | t067          | 1               | 0   | t067   | LONDON   | NK                          |
| 12483_8_69     | 2012              | 8            | 8            | t121          | 1               | 1   | t121   | EAST     | CO                          |
| 12483_8_61     | 2012              | 22           | 22           | t032          | 1               | 0   | t032   | S EAST   | CO                          |
| 12625_1_24     | 2012              | 22           | 22           | t005          | 1               | 1   | t005   | N WEST   | HO                          |
| 12625_1_25     | 2012              | 30           | 36           | t1820         | 1               | 0   | t1820  | N WEST   | HO                          |
| 12625_1_13     | 2012              | 22           | 22           | t022          | 1               | 0   | t022   | YORK&HUM | HO                          |
| 12483_8_45     | 2012              | 22           | 22           | t10125        | 1               | 0   | t10125 | N WEST   | HO                          |
| 12483_8_31     | 2012              | 22           | 22           | t2892         | 1               | 0   | t2892  | S EAST   | NK                          |
| 12483_8_68     | 2012              | 22           | 22           | t032          | 1               | 0   | t032   | S WEST   | NK                          |
| 12483_8_47     | 2012              | 30           | 36           | t268          | 1               | 0   | t268   | NK       | NK                          |
| 12483_8_21     | 2012              | 22           | 22           | t432          | 1               | 0   | t432   | LONDON   | CO                          |
| 12483_8_30     | 2012              | 22           | 22           | t032          | 1               | 0   | t032   | N WEST   | NK                          |
| 12483_8_78     | 2012              | 22           | 22           | t032          | 1               | 0   | t032   | S EAST   | NK                          |
| 12483_8_20     | 2012              | 22           | 22           | t032          | 1               | 0   | t032   | S EAST   | HO                          |
| 12483_8_19     | 2012              | 22           | 22           | t022          | 1               | 0   | t022   | LONDON   | HO                          |
| 12673_8_85     | 2012              | 22           | 22           | t790          | 1               | 0   | t790   | LONDON   | HO                          |
| 12625_1_26     | 2012              | 30           | 36           | t018          | 1               | 0   | t018   | S EAST   | HO                          |
| 12625_1_18     | 2012              | 22           | 22           | t032          | 1               | 0   | t032   | LONDON   | CO                          |
| 12625_1_29     | 2012              | 22           | 22           | t032          | 1               | 0   | t032   | N WEST   | CO                          |
| 12483_8_77     | 2012              | 22           | 22           | t032          | 1               | 0   | t032   | N WEST   | HO                          |
| 12625_1_11     | 2012              | 59           | 59           | t316          | 1               | 0   | t316   | W MIDS   | HO                          |
| 12625_1_8      | 2012              | 22           | 22           | t379          | 1               | 0   | t379   | S EAST   | HO                          |
| 12625_1_19     | 2012              | 22           | 22           | t032          | 1               | 0   | t032   | EAST     | CO                          |
| 12483_8_49     | 2012              | 22           | 22           | t032          | 1               | 0   | t032   | EAST     | CO                          |
| 12483_8_58     | 2012              | 22           | 22           | t032          | 1               | 0   | t032   | EAST     | CO                          |
| 12483_8_35     | 2012              | 22           | 22           | t005          | 1               | 1   | t005   | LONDON   | CO                          |
| 12483_8_75     | 2012              | 22           | 22           | t032          | 1               | 0   | t032   | S WEST   | HO                          |
| 12673_8_86     | 2012              | 8            | 94           | t008          | 1               | 0   | t008   | LONDON   | CO                          |
| 12483_8_25     | 2012              | 22           | 22           | t032          | 1               | 0   | t032   | N EAST   | CO                          |
| 12483_8_24     | 2012              | 22           | 22           | t032          | 1               | 0   | t032   | S EAST   | HO                          |
| 12625_1_9      | 2012              | 22           | 22           | t032          | 1               | 0   | t032   | S WEST   | CO                          |
| 12625_1_10     | 2012              | 12           | 12           | t160          | 1               | 0   | t160   | S WEST   | NK                          |

|            |      |            |                                                                                                       |   |          |          |    |
|------------|------|------------|-------------------------------------------------------------------------------------------------------|---|----------|----------|----|
| 12673_8_87 | 2012 | 8          | 8 t008                                                                                                | 1 | 0 t008   | LONDON   | HO |
| 12483_8_65 | 2012 | 59         | 59 t316                                                                                               | 1 | 0 t316   | YORK&HUM | HO |
| 12625_1_5  | 2012 | 22         | 22 t1218                                                                                              | 1 | 0 t1218  | N WEST   | CO |
| 12483_8_76 | 2012 | 22         | 22 t032                                                                                               | 1 | 0 t032   | S EAST   | HO |
| 12483_8_87 | 2012 | 22         | 22 t032                                                                                               | 1 | 0 t032   | NK       | NK |
| 12483_8_88 | 2012 | 5          | 5 t032                                                                                                | 1 | 0 t032   | LONDON   | CO |
| 12483_8_93 | 2012 | 8          | 8 t008                                                                                                | 1 | 0 t008   | LONDON   | HO |
| 12483_8_2  | 2012 | 22         | 22 t785                                                                                               | 1 | 0 t785   | YORK&HUM | CO |
| 12483_8_52 | 2012 | 22         | 22 t032                                                                                               | 1 | 0 t032   | NK       | NK |
| 12483_8_83 | 2012 | 22         | 22 t032                                                                                               | 1 | 0 t032   | E MIDS   | HO |
| 12673_8_88 | 2012 | 45         | 45 t032                                                                                               | 1 | 0 t032   | S WEST   | HO |
| 12483_8_28 | 2012 | 22         | 22 t906                                                                                               | 1 | 0 t906   | N WEST   | HO |
| 12625_1_14 | 2012 | 22         | 22 t032                                                                                               | 1 | 0 t032   | S EAST   | HO |
| 12625_1_3  | 2012 | 1          | 1 t127                                                                                                | 1 | 0 t127   | N WEST   | CO |
| 12483_8_16 | 2012 | 22         | 22 t032                                                                                               | 1 | 0 t032   | NK       | NK |
| 12483_8_55 | 2012 | 22         | 22 t032                                                                                               | 1 | 0 t032   | S EAST   | HO |
| 12483_8_81 | 2012 | 30         | 36 t018                                                                                               | 1 | 0 t018   | LONDON   | HO |
| 12625_1_27 | 2012 | 22         | 22 t032                                                                                               | 1 | 0 t032   | N EAST   | HO |
| 12483_8_51 | 2012 | 30         | 30 t1749                                                                                              | 1 | 1 t1749  | YORK&HUM | HO |
| 12483_8_4  | 2012 | 22         | 22 t513                                                                                               | 1 | 0 t513   | S WEST   | NK |
| 12483_8_56 | 2012 | 22         | 22 - (Deletions/rearrangements within the spa gene. Loss of sequence complementary to forward primer) | 1 | 0 t032   | W MIDS   | CO |
| 12483_8_32 | 2012 | 22         | 22 t2818                                                                                              | 1 | 0 t2818  | S WEST   | CO |
| 12483_8_92 | 2012 | 22         | 22 t578                                                                                               | 1 | 0 t578   | W MIDS   | CO |
| 12483_8_54 | 2012 | 22         | 22 t032                                                                                               | 1 | 0 t032   | S EAST   | CO |
| 12483_8_95 | 2012 | 22         | 22 t10172                                                                                             | 1 | 0 t10172 | S WEST   | CO |
| 12483_8_59 | 2012 | 22         | 22 t148                                                                                               | 1 | 0 t148   | W MIDS   | CO |
| 12483_8_1  | 2012 | 22         | 22 t032                                                                                               | 1 | 0 t032   | N WEST   | CO |
| 12483_8_11 | 2012 | 22         | 22 t022                                                                                               | 1 | 0 t022   | N WEST   | HO |
| 12625_1_2  | 2012 | 22         | 22 t032                                                                                               | 1 | 0 t032   | LONDON   | HO |
| 12625_1_15 | 2012 | 22         | 22 t032                                                                                               | 1 | 0 t032   | LONDON   | HO |
| 12483_8_41 | 2012 | 22         | 22 t1370                                                                                              | 1 | 0 t1370  | LONDON   | HO |
| 12483_8_60 | 2012 | unknown_CC | 72 t032                                                                                               | 1 | 0 t032   | LONDON   | HO |
| 12483_8_62 | 2012 | 22         | 22 t032                                                                                               | 1 | 0 t032   | NK       | NK |
| 12625_1_7  | 2012 | 22         | 22 t032                                                                                               | 1 | 0 t032   | LONDON   | CO |
| 12483_8_15 | 2012 | 5          | 105 t045                                                                                              | 1 | 0 t045   | S WEST   | HO |
| 12483_8_7  | 2012 | 22         | 22 t022                                                                                               | 1 | 0 t022   | S WEST   | NK |
| 12625_1_4  | 2012 | 22         | 22 t4929                                                                                              | 1 | 0 t4929  | S WEST   | NK |
| 12483_8_80 | 2012 | 5          | 5 t6445                                                                                               | 1 | 0 t6445  | W MIDS   | NK |
| 12483_8_66 | 2012 | 30         | 30 t019                                                                                               | 1 | 1 t019   | LONDON   | CO |
| 12483_8_90 | 2012 | 5          | 5 t002                                                                                                | 1 | 0 t002   | S WEST   | NK |
| 12483_8_53 | 2012 | 22         | 22 t4218                                                                                              | 1 | 0 t4218  | S WEST   | NK |
| 12483_8_34 | 2012 | 22         | 22 t032                                                                                               | 1 | 0 t032   | LONDON   | HO |
| 12625_1_1  | 2012 | 22         | 22 t020                                                                                               | 1 | 0 t020   | W MIDS   | HO |
| 12483_8_86 | 2012 | 30         | 36 t018                                                                                               | 1 | 0 t018   | LONDON   | HO |
| 12483_8_79 | 2012 | 59         | 3669 t529                                                                                             | 1 | 0 t529   | S WEST   | NK |

|            |      |    |                                                                                                        |   |          |          |    |
|------------|------|----|--------------------------------------------------------------------------------------------------------|---|----------|----------|----|
| 12483_8_9  | 2012 | 22 | 22 t2857                                                                                               | 1 | 0 t2857  | W MIDS   | NK |
| 12483_8_14 | 2012 | 59 | 59 t316                                                                                                | 1 | 0 t316   | YORK&HUM | HO |
| 12483_8_63 | 2012 | 5  | 5 t311                                                                                                 | 1 | 0 t311   | EAST     | CO |
| 12483_8_29 | 2012 | 30 | 36 t018                                                                                                | 1 | 0 t018   | S WEST   | HO |
| 12483_8_82 | 2012 | 22 | 22 t022                                                                                                | 1 | 0 t022   | LONDON   | HO |
| 12483_8_3  | 2012 | 30 | 36 t253                                                                                                | 1 | 0 t253   | E MIDS   | CO |
| 12483_8_57 | 2012 | 22 | 22 t032                                                                                                | 1 | 0 t032   | E MIDS   | CO |
| 12483_8_38 | 2012 | 22 | 22 t032                                                                                                | 1 | 0 t032   | YORK&HUM | HO |
| 12483_8_42 | 2012 | 22 | 22 t005                                                                                                | 1 | 1 t005   | LONDON   | NK |
| 12483_8_36 | 2012 | 22 | 22 t005                                                                                                | 1 | 0 t005   | YORK&HUM | HO |
| 12483_8_67 | 2012 | 22 | 22 t032                                                                                                | 1 | 0 t032   | S EAST   | CO |
| 12625_1_28 | 2012 | 22 | 22 t032                                                                                                | 1 | 0 t032   | N WEST   | HO |
| 12483_8_50 | 2012 | 22 | 22 t022                                                                                                | 1 | 0 t022   | YORK&HUM | HO |
| 12483_8_89 | 2012 | 5  | 5 t010                                                                                                 | 1 | 0 t010   | E MIDS   | CO |
| 12625_1_6  | 2012 | 30 | 30 t019                                                                                                | 1 | 1 t019   | S EAST   | CO |
| 12755_8_68 | 2012 | 1  | 1 t127                                                                                                 | 1 | 1 t127   | N WEST   | CO |
| 12483_8_94 | 2012 | 22 | 22 t032                                                                                                | 1 | 0 t032   | NK       | NK |
| 12483_8_84 | 2012 | 22 | 22 t020                                                                                                | 1 | 0 t020   | N WEST   | NK |
| 12483_8_26 | 2012 | 8  | 3727 t334                                                                                              | 1 | 0 t334   | S WEST   | NK |
| 12625_1_30 | 2012 | 30 | 36 t018                                                                                                | 1 | 0 t018   | LONDON   | HO |
| 12625_1_32 | 2012 | 5  | 3743 t1781                                                                                             | 1 | 0 t1781  | N WEST   | CO |
| 12589_1_6  | 2012 | 22 | 22 t3612                                                                                               | 1 | 0 t3612  | S WEST   | CO |
| 12625_1_33 | 2012 | 22 | 22 t020                                                                                                | 1 | 0 t020   | S WEST   | CO |
| 12625_1_34 | 2012 | 5  | 526 - (Deletions/rearrangements within the spa gene. Loss of sequence complementary to forward primer) | 1 | 1 t002   | N WEST   | CO |
| 12625_1_35 | 2012 | 22 | 22 t032                                                                                                | 1 | 0 t032   | EAST     | HO |
| 12625_1_36 | 2012 | 22 | 22 t032                                                                                                | 1 | 0 t032   | N EAST   | NK |
| 12625_1_37 | 2012 | 22 | 22 t032                                                                                                | 1 | 0 t032   | N EAST   | NK |
| 12625_1_38 | 2012 | 88 | 88 t1816                                                                                               | 1 | 1 t1816  | S EAST   | NK |
| 12625_1_42 | 2012 | 22 | 22 t8530                                                                                               | 1 | 0 t8530  | S WEST   | CO |
| 12625_1_43 | 2012 | 1  | 1 t127                                                                                                 | 1 | 0 t127   | LONDON   | HO |
| 12625_1_45 | 2012 | 22 | 22 t11666                                                                                              | 1 | 0 t11666 | S WEST   | CO |
| 12625_1_46 | 2012 | 22 | 22 t3612                                                                                               | 1 | 0 t3612  | S WEST   | CO |
| 12625_1_47 | 2012 | 22 | 22 t022                                                                                                | 1 | 0 t022   | S WEST   | CO |
| 12625_1_48 | 2012 | 22 | 22 t432                                                                                                | 1 | 0 t432   | W MIDS   | CO |
| 12625_1_49 | 2012 | 22 | 22 t4573                                                                                               | 1 | 1 t4573  | W MIDS   | CO |
| 12625_1_53 | 2013 | 22 | 3122 t032                                                                                              | 1 | 0 t032   | S EAST   | HO |
| 12625_1_54 | 2013 | 22 | 22 t032                                                                                                | 1 | 0 t032   | S EAST   | HO |
| 12625_1_50 | 2012 | 22 | 22 t032                                                                                                | 1 | 0 t032   | N EAST   | HO |
| 12625_1_51 | 2013 | 22 | 22 t032                                                                                                | 1 | 0 t032   | W MIDS   | CO |
| 12625_1_52 | 2013 | 22 | 22 t032                                                                                                | 1 | 0 t032   | W MIDS   | CO |
| 12625_1_55 | 2013 | 8  | 8 t104                                                                                                 | 1 | 1 t104   | S EAST   | NK |
| 12625_1_56 | 2012 | 22 | 22 t1041                                                                                               | 1 | 0 t1041  | EAST     | CO |
| 12625_1_57 | 2013 | 22 | 22 t8473                                                                                               | 1 | 0 t8473  | LONDON   | HO |
| 12625_1_59 | 2013 | 22 | 22 t032                                                                                                | 1 | 0 t032   | S EAST   | HO |
| 12625_1_60 | 2013 | 22 | 22 t032                                                                                                | 1 | 0 t032   | LONDON   | HO |

|            |      |            |           |   |          |          |    |
|------------|------|------------|-----------|---|----------|----------|----|
| 12625_1_61 | 2013 | 22         | 22 t032   | 1 | 0 t032   | YORK&HUM | CO |
| 12625_1_62 | 2013 | 22         | 22 t032   | 1 | 0 t032   | LONDON   | CO |
| 12625_1_63 | 2012 | 22         | 22 t032   | 1 | 0 t032   | N EAST   | NK |
| 12625_1_64 | 2013 | 22         | 22 t022   | 1 | 0 t022   | LONDON   | HO |
| 12625_1_65 | 2013 | unknown_CC | 80 t044   | 1 | 1 t044   | NK       | NK |
| 12589_1_7  | 2012 | 22         | 22 t032   | 1 | 0 t032   | E MIDS   | CO |
| 12625_1_66 | 2013 | 22         | 22 t032   | 1 | 0 t032   | E MIDS   | HO |
| 12625_1_67 | 2013 | 30         | 36 t018   | 1 | 0 t018   | N WEST   | HO |
| 12625_1_69 | 2013 | 22         | 22 t032   | 1 | 0 t032   | S EAST   | CO |
| 12625_1_70 | 2013 | 22         | 22 t906   | 1 | 0 t906   | N WEST   | CO |
| 12625_1_71 | 2013 | 22         | 22 t1499  | 1 | 0 t1499  | N WEST   | NK |
| 12625_1_72 | 2013 | 1          | 1 t127    | 1 | 0 t127   | EAST     | CO |
| 12625_1_73 | 2013 | 22         | 22 t032   | 1 | 0 t032   | S EAST   | HO |
| 12625_1_74 | 2013 | 22         | 22 t032   | 1 | 0 t032   | LONDON   | HO |
| 12625_1_75 | 2013 | 8          | 8 t008    | 1 | 1 t008   | YORK&HUM | CO |
| 12625_1_76 | 2013 | 45         | 46 t040   | 1 | 0 t040   | EAST     | CO |
| 12625_1_78 | 2013 | unknown_CC | 93 t202   | 1 | 1 t202   | S EAST   | CO |
| 12625_1_79 | 2013 | 30         | 3674 t253 | 1 | 0 t253   | E MIDS   | HO |
| 12625_1_80 | 2013 | 1          | 772 t657  | 1 | 1 t657   | S WEST   | NK |
| 12625_1_81 | 2013 | 5          | 5 t002    | 1 | 1 t002   | LONDON   | HO |
| 12625_1_82 | 2013 | 30         | 36 t018   | 1 | 0 t018   | N WEST   | CO |
| 12625_1_83 | 2013 | 22         | 22 t1612  | 1 | 0 t1612  | S WEST   | NK |
| 12625_1_84 | 2013 | 22         | 22 t032   | 1 | 0 t032   | LONDON   | CO |
| 12625_1_85 | 2013 | 22         | 22 t032   | 1 | 0 t032   | NK       | NK |
| 12625_1_86 | 2013 | 45         | 45 t077   | 1 | 0 t077   | LONDON   | CO |
| 12625_1_87 | 2013 | 5          | 5 t002    | 1 | 1 t002   | LONDON   | HO |
| 12625_1_89 | 2013 | 22         | 22 t032   | 1 | 0 t032   | N WEST   | CO |
| 12625_1_90 | 2013 | 22         | 22 t852   | 1 | 1 t852   | N WEST   | HO |
| 12625_1_91 | 2013 | 22         | 22 t032   | 1 | 0 t032   | N WEST   | CO |
| 12625_1_92 | 2013 | 22         | 22 t032   | 1 | 0 t032   | S EAST   | HO |
| 12625_1_93 | 2013 | 22         | 22 t020   | 1 | 0 t020   | S EAST   | CO |
| 12625_1_95 | 2013 | 22         | 22 t032   | 1 | 0 t032   | EAST     | CO |
| 12593_1_1  | 2013 | 5          | 5 t2724   | 1 | 0 t2724  | N WEST   | CO |
| 12593_1_2  | 2013 | 22         | 22 t032   | 1 | 0 t032   | S EAST   | CO |
| 12593_1_4  | 2013 | 22         | 22 t11885 | 1 | 0 t11885 | LONDON   | HO |
| 12593_1_64 | 2013 | 5          | 5 t002    | 1 | 0 t002   | LONDON   | CO |
| 12593_1_5  | 2013 | 22         | 22 t032   | 1 | 0 t032   | E MIDS   | CO |
| 12593_1_6  | 2013 | 30         | 36 t018   | 1 | 0 t018   | LONDON   | HO |
| 12593_1_7  | 2013 | 22         | 22 t11279 | 1 | 0 t11279 | S EAST   | NK |
| 12593_1_9  | 2013 | 22         | 22 t020   | 1 | 0 t020   | EAST     | HO |
| 12593_1_10 | 2013 | 1          | 1 t127    | 1 | 0 t127   | N WEST   | CO |
| 12593_1_11 | 2013 | 22         | 22 t032   | 1 | 0 t032   | N WEST   | HO |
| 12593_1_13 | 2013 | 22         | 22 t8964  | 1 | 0 t8964  | EAST     | CO |
| 12593_1_65 | 2013 | 8          | 239 t037  | 1 | 0 t037   | EAST     | HO |
| 12593_1_15 | 2013 | 8          | 8 t008    | 1 | 1 t008   | LONDON   | CO |
| 12593_1_16 | 2013 | 5          | 5 t002    | 1 | 0 t002   | N WEST   | HO |

|            |      |            |                                                                                                       |   |         |          |    |
|------------|------|------------|-------------------------------------------------------------------------------------------------------|---|---------|----------|----|
| 12593_1_17 | 2013 | 59         | 59 t316                                                                                               | 1 | 0 t316  | W MIDS   | CO |
| 12593_1_18 | 2013 | 22         | 22 t022                                                                                               | 1 | 0 t022  | W MIDS   | CO |
| 12593_1_19 | 2013 | 22         | 22 t032                                                                                               | 1 | 0 t032  | N EAST   | HO |
| 12593_1_20 | 2013 | 1          | 1 t127                                                                                                | 1 | 0 t127  | LONDON   | CO |
| 12593_1_21 | 2013 | 22         | 22 t032                                                                                               | 1 | 0 t032  | S EAST   | CO |
| 12593_1_22 | 2013 | 22         | 22 t032                                                                                               | 1 | 0 t032  | LONDON   | HO |
| 12593_1_23 | 2013 | 22         | 22 t032                                                                                               | 1 | 0 t032  | LONDON   | HO |
| 12593_1_24 | 2013 | 22         | 22 t020                                                                                               | 1 | 0 t020  | EAST     | NK |
| 12593_1_66 | 2013 | 22         | 22 t020                                                                                               | 1 | 0 t020  | EAST     | CO |
| 12593_1_26 | 2013 | 22         | 22 t1467                                                                                              | 1 | 0 t1467 | N EAST   | NK |
| 12593_1_27 | 2013 | 22         | 22 t032                                                                                               | 1 | 0 t032  | EAST     | HO |
| 12593_1_28 | 2013 | 22         | 22 t3861                                                                                              | 1 | 0 t3861 | LONDON   | CO |
| 12589_1_8  | 2013 | 22         | 22 t9502                                                                                              | 1 | 0 t9502 | S WEST   | HO |
| 12593_1_29 | 2013 | 1          | 1 t2279                                                                                               | 1 | 0 t2279 | W MIDS   | HO |
| 12593_1_30 | 2013 | 22         | 22 t032                                                                                               | 1 | 0 t032  | S EAST   | HO |
| 12593_1_68 | 2013 | 22         | 22 t032                                                                                               | 1 | 0 t032  | LONDON   | CO |
| 12593_1_69 | 2013 | 22         | 22 t020                                                                                               | 1 | 0 t020  | LONDON   | HO |
| 12589_1_9  | 2013 | 5          | 5 t1341                                                                                               | 1 | 0 t1341 | S WEST   | HO |
| 12589_1_10 | 2013 | 5          | 1340 t002                                                                                             | 1 | 0 t002  | LONDON   | CO |
| 12589_1_11 | 2013 | 1          | 1 t127                                                                                                | 1 | 0 t127  | N WEST   | HO |
| 12589_1_12 | 2013 | 22         | 22 t022                                                                                               | 1 | 0 t022  | LONDON   | HO |
| 12593_1_31 | 2013 | unknown_CC | 78 t186                                                                                               | 1 | 0 t186  | YORK&HUM | CO |
| 12589_1_13 | 2013 | 22         | 22 t032                                                                                               | 1 | 0 t032  | LONDON   | HO |
| 12593_1_32 | 2013 | 5          | 5 t002                                                                                                | 1 | 0 t002  | LONDON   | HO |
| 12593_1_33 | 2013 | 22         | 22 t223                                                                                               | 1 | 0 t223  | W MIDS   | CO |
| 12589_1_17 | 2013 | 22         | 22 t032                                                                                               | 1 | 0 t032  | N EAST   | NK |
| 12593_1_72 | 2013 | 22         | 22 t2818                                                                                              | 1 | 0 t2818 | S WEST   | NK |
| 12593_1_73 | 2013 | 22         | 22 t5892                                                                                              | 1 | 0 t5892 | S EAST   | HO |
| 12589_1_19 | 2013 | 22         | 22 t032                                                                                               | 1 | 0 t032  | S WEST   | NK |
| 12593_1_35 | 2013 | 22         | 22 t032                                                                                               | 1 | 0 t032  | NK       | NK |
| 12593_1_75 | 2013 | 22         | 22 t032                                                                                               | 1 | 0 t032  | E MIDS   | CO |
| 12593_1_76 | 2013 | 22         | 22 t852                                                                                               | 1 | 1 t852  | LONDON   | HO |
| 12589_1_20 | 2013 | 5          | 5 t010                                                                                                | 1 | 0 t010  | EAST     | CO |
| 12589_1_21 | 2013 | 22         | 22 t032                                                                                               | 1 | 0 t032  | S EAST   | HO |
| 12589_1_22 | 2013 | 22         | 22 - (Deletions/rearrangements within the spa gene. Loss of sequence complementary to forward primer) | 1 | 0 t032  | W MIDS   | CO |
| 12589_1_50 | 2013 | 22         | 22 t032                                                                                               | 1 | 0 t032  | N WEST   | HO |
| 12593_1_37 | 2013 | 59         | 59 t316                                                                                               | 1 | 0 t316  | YORK&HUM | HO |
| 12593_1_38 | 2013 | 22         | 22 t025                                                                                               | 1 | 0 t025  | N WEST   | HO |
| 12589_1_23 | 2013 | 22         | 22 t032                                                                                               | 1 | 0 t032  | LONDON   | HO |
| 12589_1_24 | 2013 | unknown_CC | 152 t1828                                                                                             | 1 | 1 t1828 | LONDON   | CO |
| 12593_1_77 | 2013 | 22         | 22 t022                                                                                               | 1 | 0 t022  | W MIDS   | HO |
| 12593_1_78 | 2013 | 30         | 36 t253                                                                                               | 1 | 0 t253  | S WEST   | NK |
| 12593_1_79 | 2013 | 30         | 36 t253                                                                                               | 1 | 0 t253  | S WEST   | NK |
| 12593_1_80 | 2013 | 22         | 2916 t578                                                                                             | 1 | 0 t578  | YORK&HUM | HO |
| 12589_1_51 | 2013 | 22         | 22 t032                                                                                               | 1 | 0 t032  | LONDON   | CO |

|            |      |            |                                                                                                       |   |          |          |    |
|------------|------|------------|-------------------------------------------------------------------------------------------------------|---|----------|----------|----|
| 12589_1_62 | 2013 | 30         | 36 t012                                                                                               | 1 | 0 t012   | LONDON   | CO |
| 12755_8_70 | 2013 | 22         | 22 t032                                                                                               | 1 | 0 t032   | E MIDS   | CO |
| 12593_1_40 | 2013 | 8          | 241 t037                                                                                              | 1 | 0 t037   | LONDON   | CO |
| 12593_1_41 | 2013 | 22         | 22 t4559                                                                                              | 1 | 0 t4559  | E MIDS   | HO |
| 12593_1_42 | 2013 | 22         | 22 t852                                                                                               | 1 | 1 t852   | LONDON   | HO |
| 12589_1_28 | 2013 | 22         | 22 t032                                                                                               | 1 | 0 t032   | S WEST   | CO |
| 12593_1_44 | 2013 | 22         | 22 t022                                                                                               | 1 | 0 t022   | N EAST   | NK |
| 12593_1_45 | 2013 | 22         | 22 t022                                                                                               | 1 | 0 t022   | N EAST   | NK |
| 12593_1_46 | 2013 | 30         | 2938 t018                                                                                             | 1 | 0 t018   | LONDON   | CO |
| 12589_1_63 | 2013 | 22         | 22 t1214                                                                                              | 1 | 0 t1214  | W MIDS   | CO |
| 12589_1_29 | 2013 | 22         | 3734 t12520                                                                                           | 1 | 0 t12520 | EAST     | HO |
| 12593_1_81 | 2013 | 22         | 3824 t022                                                                                             | 1 | 0 t022   | E MIDS   | CO |
| 12589_1_54 | 2013 | 30         | 3672 t018                                                                                             | 1 | 0 t018   | S EAST   | HO |
| 12593_1_82 | 2013 | 22         | 22 t032                                                                                               | 1 | 0 t032   | NK       | NK |
| 12589_1_52 | 2013 | 22         | 22 t032                                                                                               | 1 | 0 t032   | N WEST   | HO |
| 12589_1_31 | 2013 | 22         | 22 - (Deletions/rearrangements within the spa gene. Loss of sequence complementary to forward primer) | 1 | 0 t032   | E MIDS   | CO |
| 12589_1_32 | 2013 | 22         | 22 t020                                                                                               | 1 | 0 t020   | S EAST   | HO |
| 12593_1_83 | 2013 | 45         | 45 t630                                                                                               | 1 | 0 t630   | W MIDS   | CO |
| 12589_1_35 | 2013 | 22         | 22 t8473                                                                                              | 1 | 0 t8473  | LONDON   | HO |
| 12593_1_84 | 2013 | 22         | 22 t022                                                                                               | 1 | 0 t022   | S EAST   | HO |
| 12593_1_47 | 2013 | 22         | 22 t2818                                                                                              | 1 | 0 t2818  | S WEST   | HO |
| 12593_1_48 | 2013 | 22         | 22 t12254                                                                                             | 1 | 0 t12254 | W MIDS   | NK |
| 12593_1_49 | 2013 | 22         | 22 t557                                                                                               | 1 | 0 t557   | N EAST   | HO |
| 12593_1_50 | 2013 | 22         | 22 t852                                                                                               | 1 | 1 t852   | S WEST   | CO |
| 12593_1_51 | 2013 | 30         | 30 t019                                                                                               | 1 | 1 t019   | LONDON   | CO |
| 12593_1_52 | 2013 | 22         | 22 - (Deletions/rearrangements within the spa gene. Loss of sequence complementary to forward primer) | 1 | 0 t1218  | N WEST   | CO |
| 12593_1_53 | 2013 | 45         | 45 t026                                                                                               | 1 | 0 t026   | LONDON   | CO |
| 12593_1_86 | 2013 | unknown_CC | 78 t3202                                                                                              | 1 | 0 t3202  | YORK&HUM | HO |
| 12593_1_87 | 2013 | 1          | 1 t127                                                                                                | 1 | 0 t127   | LONDON   | HO |
| 12589_1_55 | 2013 | 22         | 22 t032                                                                                               | 1 | 0 t032   | EAST     | HO |
| 12593_1_88 | 2013 | 22         | 22 t032                                                                                               | 1 | 0 t032   | YORK&HUM | NK |
| 12589_1_36 | 2013 | 22         | 22 t6859                                                                                              | 1 | 0 t6859  | LONDON   | NK |
| 12593_1_89 | 2013 | 22         | 22 t022                                                                                               | 1 | 0 t022   | LONDON   | CO |
| 12593_1_90 | 2013 | 22         | 22 t032                                                                                               | 1 | 0 t032   | LONDON   | CO |
| 12593_1_91 | 2013 | 5          | 5 t002                                                                                                | 1 | 0 t002   | N WEST   | HO |
| 12589_1_53 | 2013 | 5          | 5 t002                                                                                                | 1 | 1 t002   | LONDON   | HO |
| 12589_1_37 | 2013 | 22         | 22 - (Deletions/rearrangements within the spa gene. Loss of sequence complementary to forward primer) | 1 | 0 t032   | W MIDS   | CO |
| 12593_1_92 | 2013 | 5          | 5 t002                                                                                                | 1 | 0 t002   | N WEST   | HO |
| 12589_1_38 | 2013 | 22         | 22 t032                                                                                               | 1 | 0 t032   | N EAST   | HO |
| 12589_1_39 | 2013 | 22         | 3735 t12287                                                                                           | 1 | 0 t12287 | LONDON   | HO |
| 12593_1_93 | 2013 | 22         | 22 t12293                                                                                             | 1 | 0 t12293 | N EAST   | NK |
| 12589_1_40 | 2013 | 22         | 22 t379                                                                                               | 1 | 0 t379   | N EAST   | NK |
| 12593_1_95 | 2013 | 22         | 22 t032                                                                                               | 1 | 0 t032   | N WEST   | HO |

|            |      |            |           |   |          |          |    |
|------------|------|------------|-----------|---|----------|----------|----|
| 12589_1_1  | 2013 | 30         | 1456 t019 | 1 | 1 t019   | LONDON   | CO |
| 12589_1_2  | 2013 | 45         | 45 t1081  | 1 | 0 t1081  | LONDON   | CO |
| 12589_1_42 | 2013 | 5          | 3074 t002 | 1 | 0 t002   | N WEST   | CO |
| 12589_1_43 | 2013 | 22         | 3734 t025 | 1 | 0 t025   | EAST     | HO |
| 12589_1_44 | 2013 | 22         | 22 t557   | 1 | 0 t557   | LONDON   | HO |
| 12589_1_3  | 2013 | 1          | 1 t127    | 1 | 0 t127   | S EAST   | CO |
| 12593_1_57 | 2013 | 5          | 149 t002  | 1 | 0 t002   | E MIDS   | CO |
| 12589_1_45 | 2013 | 22         | 22 t032   | 1 | 0 t032   | W MIDS   | HO |
| 12593_1_58 | 2013 | 22         | 22 t032   | 1 | 0 t032   | LONDON   | CO |
| 12589_1_48 | 2013 | 30         | 3671 t018 | 1 | 0 t018   | LONDON   | NK |
| 12589_1_47 | 2013 | 22         | 22 t1214  | 1 | 0 t1214  | LONDON   | CO |
| 12589_1_46 | 2013 | 22         | 22 t032   | 1 | 0 t032   | LONDON   | HO |
| 12589_1_4  | 2013 | 22         | 22 t032   | 1 | 0 t032   | NK       | NK |
| 12589_1_5  | 2013 | 22         | 22 t032   | 1 | 0 t032   | W MIDS   | CO |
| 12589_1_61 | 2013 | 59         | 59 t7344  | 1 | 0 t7344  | YORK&HUM | CO |
| 12593_1_59 | 2013 | 22         | 22 t032   | 1 | 0 t032   | YORK&HUM | HO |
| 12589_1_58 | 2013 | 8          | 8 t1774   | 1 | 0 t1774  | S WEST   | NK |
| 12589_1_59 | 2013 | 1          | 1 t127    | 1 | 0 t127   | N WEST   | HO |
| 12593_1_61 | 2013 | 22         | 22 t032   | 1 | 0 t032   | S EAST   | CO |
| 12593_1_62 | 2013 | 5          | 5 t002    | 1 | 0 t002   | N WEST   | HO |
| 12593_1_63 | 2013 | 30         | 36 t018   | 1 | 0 t018   | LONDON   | HO |
| 12589_1_60 | 2013 | 5          | 5 t002    | 1 | 0 t002   | S WEST   | CO |
| 12589_1_65 | 2013 | unknown_CC | 3673 t044 | 1 | 1 t044   | E MIDS   | HO |
| 12589_1_66 | 2013 | 5          | 5 t002    | 1 | 0 t002   | S EAST   | CO |
| 12589_1_67 | 2013 | 30         | 36 t018   | 1 | 0 t018   | S WEST   | HO |
| 12589_1_68 | 2013 | 22         | 22 t032   | 1 | 0 t032   | S WEST   | HO |
| 12589_1_69 | 2013 | 22         | 22 t10718 | 1 | 0 t10718 | N WEST   | CO |
| 12589_1_70 | 2013 | 22         | 22 t032   | 1 | 0 t032   | LONDON   | HO |
| 12589_1_71 | 2013 | 22         | 22 t032   | 1 | 0 t032   | S EAST   | HO |
| 12589_1_72 | 2013 | 22         | 22 t020   | 1 | 0 t020   | S EAST   | HO |
| 12589_1_73 | 2013 | 5          | 5 t002    | 1 | 0 t002   | NK       | NK |
| 12589_1_74 | 2013 | 1          | 1 t127    | 1 | 0 t127   | LONDON   | CO |
| 12755_8_71 | 2013 | 22         | 22 t032   | 1 | 0 t032   | N WEST   | CO |
| 12755_8_72 | 2013 | 22         | 22 t557   | 1 | 0 t557   | N EAST   | NK |
| 12589_1_77 | 2013 | 22         | 22 t032   | 1 | 0 t032   | N EAST   | CO |
| 12589_1_78 | 2013 | 22         | 22 t032   | 1 | 0 t032   | N EAST   | CO |
| 12589_1_80 | 2013 | 22         | 22 t032   | 1 | 0 t032   | NK       | NK |
| 12589_1_81 | 2013 | 22         | 22 t032   | 1 | 0 t032   | LONDON   | HO |
| 12589_1_82 | 2013 | 22         | 22 t032   | 1 | 0 t032   | LONDON   | HO |
| 12589_1_83 | 2013 | 22         | 22 t12422 | 1 | 0 t12422 | LONDON   | HO |
| 12589_1_84 | 2013 | 22         | 22 t022   | 1 | 0 t022   | LONDON   | NK |
| 12589_1_85 | 2012 | 22         | 22 t032   | 1 | 0 t032   | LONDON   | HO |
| 12589_1_86 | 2013 | 22         | 3737 t032 | 1 | 0 t032   | LONDON   | HO |
| 12589_1_87 | 2013 | 22         | 22 t032   | 1 | 0 t032   | YORK&HUM | CO |
| 12589_1_88 | 2013 | 22         | 22 t032   | 1 | 0 t032   | N WEST   | NK |
| 12593_2_77 | 2013 | 22         | 22 t2235  | 1 | 0 t2235  | S EAST   | CO |

|            |      |    |                                                                                                        |   |          |          |    |
|------------|------|----|--------------------------------------------------------------------------------------------------------|---|----------|----------|----|
| 12589_1_89 | 2013 | 22 | 22 t2752                                                                                               | 1 | 0 t2752  | YORK&HUM | CO |
| 12755_8_73 | 2013 | 22 | 22 t032                                                                                                | 1 | 0 t032   | EAST     | CO |
| 12589_1_90 | 2013 | 8  | 8 t008                                                                                                 | 1 | 0 t008   | LONDON   | CO |
| 12589_1_91 | 2013 | 22 | 1082 t1612                                                                                             | 1 | 0 t1612  | S EAST   | CO |
| 12589_1_92 | 2013 | 22 | 3738 t2818                                                                                             | 1 | 0 t2818  | S WEST   | NK |
| 12589_1_94 | 2013 | 22 | 22 t032                                                                                                | 1 | 0 t032   | W MIDS   | HO |
| 12593_2_78 | 2013 | 22 | 22 t020                                                                                                | 1 | 0 t020   | EAST     | CO |
| 12589_1_95 | 2013 | 22 | 22 t032                                                                                                | 1 | 0 t032   | YORK&HUM | CO |
| 12593_2_1  | 2013 | 22 | 22 t022                                                                                                | 1 | 0 t022   | W MIDS   | CO |
| 12593_2_2  | 2013 | 22 | 22 t8703                                                                                               | 1 | 0 t8703  | LONDON   | HO |
| 12593_2_3  | 2013 | 22 | 22 t032                                                                                                | 1 | 0 t032   | S EAST   | HO |
| 12593_2_7  | 2013 | 97 | 97 t6576                                                                                               | 1 | 0 t6576  | S EAST   | CO |
| 12593_2_8  | 2013 | 5  | 5 t002                                                                                                 | 1 | 0 t002   | LONDON   | CO |
| 12593_2_9  | 2013 | 22 | 22 t1302                                                                                               | 1 | 0 t1302  | N WEST   | HO |
| 12593_2_10 | 2013 | 22 | 22 t022                                                                                                | 1 | 0 t022   | LONDON   | CO |
| 12593_2_11 | 2013 | 59 | 59 t7344                                                                                               | 1 | 0 t7344  | YORK&HUM | CO |
| 12593_2_12 | 2013 | 22 | 22 t032                                                                                                | 1 | 0 t032   | W MIDS   | CO |
| 12593_2_13 | 2013 | 22 | 22 t032                                                                                                | 1 | 0 t032   | N WEST   | NK |
| 12593_2_14 | 2013 | 22 | 22 t032                                                                                                | 1 | 0 t032   | N WEST   | HO |
| 12593_2_15 | 2013 | 88 | 88 t5973                                                                                               | 1 | 0 t5973  | N WEST   | NK |
| 12593_2_16 | 2013 | 22 | 22 t12550                                                                                              | 1 | 0 t12550 | N WEST   | CO |
| 12593_2_17 | 2013 | 22 | 22 t032                                                                                                | 1 | 0 t032   | E MIDS   | HO |
| 12593_2_18 | 2013 | 22 | 22 t022                                                                                                | 1 | 0 t022   | EAST     | HO |
| 12593_2_20 | 2013 | 30 | 36 t018                                                                                                | 1 | 0 t018   | S EAST   | CO |
| 12593_2_21 | 2013 | 22 | 22 t578                                                                                                | 1 | 0 t578   | N WEST   | HO |
| 12593_2_22 | 2013 | 5  | 526 - (Deletions/rearrangements within the spa gene. Loss of sequence complementary to forward primer) | 1 | 0 t8084  | S EAST   | CO |
| 12593_2_25 | 2013 | 22 | 22 t032                                                                                                | 1 | 0 t032   | N EAST   | NK |
| 12593_2_79 | 2013 | 22 | 22 t032                                                                                                | 1 | 0 t032   | YORK&HUM | CO |
| 12593_2_26 | 2013 | 22 | 22 t020                                                                                                | 1 | 0 t020   | S WEST   | HO |
| 12593_2_27 | 2013 | 22 | 3739 t032                                                                                              | 1 | 0 t032   | S WEST   | HO |
| 12593_2_80 | 2013 | 7  | 7 t12607                                                                                               | 1 | 0 t12607 | S WEST   | CO |
| 12593_2_28 | 2013 | 5  | 105 t002                                                                                               | 1 | 0 t002   | LONDON   | CO |
| 12593_2_74 | 2013 | 22 | 22 t032                                                                                                | 1 | 0 t032   | S EAST   | HO |
| 12593_2_29 | 2013 | 22 | 22 t032                                                                                                | 1 | 0 t032   | LONDON   | HO |
| 12593_2_30 | 2013 | 30 | 30 t021                                                                                                | 1 | 1 t021   | LONDON   | CO |
| 12593_2_31 | 2013 | 22 | 22 t12651                                                                                              | 1 | 0 t12651 | S WEST   | HO |
| 12593_2_34 | 2013 | 22 | 22 t020                                                                                                | 1 | 0 t020   | LONDON   | CO |
| 12593_2_40 | 2013 | 5  | 5 t002                                                                                                 | 1 | 0 t002   | S WEST   | CO |
| 12593_2_42 | 2013 | 22 | 22 t022                                                                                                | 1 | 0 t022   | E MIDS   | CO |
| 12593_2_43 | 2013 | 22 | 22 t032                                                                                                | 1 | 0 t032   | E MIDS   | HO |
| 12593_2_37 | 2013 | 22 | 22 t1500                                                                                               | 1 | 0 t1500  | S WEST   | HO |
| 12593_2_38 | 2013 | 1  | 772 t657                                                                                               | 1 | 1 t657   | YORK&HUM | HO |
| 12593_2_45 | 2013 | 8  | 8 t1774                                                                                                | 1 | 0 t1774  | N WEST   | HO |
| 12593_2_46 | 2013 | 22 | 22 t032                                                                                                | 1 | 0 t032   | S EAST   | NK |
| 12593_2_47 | 2013 | 22 | 22 t790                                                                                                | 1 | 0 t790   | EAST     | HO |



|            |      |            |            |   |          |          |    |
|------------|------|------------|------------|---|----------|----------|----|
| 12593_2_48 | 2013 | 22         | 22 t032    | 1 | 0 t032   | LONDON   | CO |
| 12593_2_49 | 2013 | 22         | 22 t032    | 1 | 0 t032   | LONDON   | NK |
| 12593_2_50 | 2013 | 22         | 22 t025    | 1 | 0 t025   | S WEST   | NK |
| 12593_2_51 | 2013 | 5          | 5 t1154    | 1 | 1 t1154  | S EAST   | CO |
| 12593_2_52 | 2013 | 22         | 22 t032    | 1 | 0 t032   | S WEST   | HO |
| 12593_2_53 | 2013 | 22         | 22 t032    | 1 | 0 t032   | LONDON   | HO |
| 12593_2_54 | 2013 | 22         | 22 t032    | 1 | 0 t032   | W MIDS   | CO |
| 12593_2_55 | 2013 | 30         | 30 t019    | 1 | 1 t019   | S EAST   | NK |
| 12593_2_56 | 2013 | 30         | 36 t018    | 1 | 0 t018   | YORK&HUM | HO |
| 12593_2_81 | 2013 | 59         | 3740 t7344 | 1 | 0 t7344  | YORK&HUM | CO |
| 12593_2_61 | 2013 | 22         | 22 t032    | 1 | 0 t032   | S EAST   | HO |
| 12593_2_62 | 2013 | 8          | 8 t008     | 1 | 0 t008   | S EAST   | HO |
| 12593_2_82 | 2013 | 22         | 22 t020    | 1 | 0 t020   | LONDON   | HO |
| 12593_2_64 | 2013 | 97         | 97 t12761  | 1 | 0 t12761 | N WEST   | HO |
| 12593_2_57 | 2013 | 5          | 5 t002     | 1 | 0 t002   | S WEST   | NK |
| 12593_2_58 | 2013 | 22         | 22 t022    | 1 | 0 t022   | LONDON   | CO |
| 12593_2_59 | 2013 | unknown_CC | 361 t315   | 1 | 0 t315   | LONDON   | NK |
| 12593_2_60 | 2013 | 22         | 22 t025    | 1 | 0 t025   | S WEST   | HO |
| 12593_2_69 | 2013 | 22         | 22 t032    | 1 | 0 t032   | LONDON   | CO |
| 12593_2_70 | 2013 | 22         | 22 t2892   | 1 | 0 t2892  | S EAST   | HO |
| 12593_2_71 | 2013 | 22         | 22 t032    | 1 | 0 t032   | W MIDS   | CO |
| 12593_2_83 | 2013 | 5          | 5 t002     | 1 | 0 t002   | YORK&HUM | HO |
| 12593_2_72 | 2013 | 22         | 22 t032    | 1 | 0 t032   | LONDON   | CO |
| 12593_2_65 | 2013 | 22         | 22 t379    | 1 | 0 t379   | W MIDS   | HO |
| 12593_2_84 | 2013 | 5          | 5 t002     | 1 | 0 t002   | S WEST   | CO |
| 12593_2_66 | 2013 | 30         | 30 t122    | 1 | 1 t122   | LONDON   | NK |
| 12593_2_67 | 2013 | 1          | 1 t127     | 1 | 0 t127   | W MIDS   | CO |
| 12593_2_68 | 2013 | 8          | 241 t037   | 1 | 0 t037   | LONDON   | HO |
| 12593_2_91 | 2013 | 30         | 36 t018    | 1 | 0 t018   | LONDON   | NK |
| 12593_2_92 | 2013 | 22         | 22 t032    | 1 | 0 t032   | LONDON   | HO |
| 12593_2_93 | 2013 | 22         | 22 t032    | 1 | 0 t032   | E MIDS   | CO |
| 12593_2_95 | 2013 | 1          | 1 t127     | 1 | 0 t127   | S EAST   | HO |
| 12673_8_44 | 2013 | 8          | 8 t008     | 1 | 1 t008   | W MIDS   | NK |
| 12673_8_78 | 2013 | 22         | 3757 t032  | 1 | 0 t032   | LONDON   | CO |
| 12673_8_60 | 2013 | 8          | 8 t008     | 1 | 1 t008   | S EAST   | HO |
| 12673_8_61 | 2013 | unknown_CC | 361 t315   | 1 | 0 t315   | LONDON   | CO |
| 12673_8_70 | 2013 | 8          | 241 t037   | 1 | 0 t037   | LONDON   | NK |
| 12673_8_71 | 2013 | 22         | 22 t020    | 1 | 0 t020   | S WEST   | HO |
| 12673_8_77 | 2013 | 8          | 8 t008     | 1 | 0 t008   | S EAST   | CO |
| 12673_8_62 | 2013 | 8          | 8 t008     | 1 | 0 t008   | YORK&HUM | CO |
| 12673_8_63 | 2013 | 1          | 1 t127     | 1 | 0 t127   | S WEST   | CO |
| 12673_8_66 | 2013 | 5          | 5 t002     | 1 | 0 t002   | S WEST   | NK |
| 12673_8_55 | 2013 | 5          | 149 t002   | 1 | 0 t002   | LONDON   | NK |
| 12673_8_56 | 2013 | 22         | 22 t032    | 1 | 0 t032   | S EAST   | NK |
| 12673_8_68 | 2013 | 5          | 5 t002     | 1 | 0 t002   | E MIDS   | HO |
| 12673_8_69 | 2013 | 22         | 22 t032    | 1 | 0 t032   | E MIDS   | HO |

|            |      |    |           |   |         |          |    |
|------------|------|----|-----------|---|---------|----------|----|
| 12673_8_76 | 2013 | 22 | 22 t005   | 1 | 1 t005  | S EAST   | CO |
| 12673_8_51 | 2013 | 1  | 1 t127    | 1 | 0 t127  | S WEST   | HO |
| 12673_8_52 | 2013 | 22 | 22 t032   | 1 | 0 t032  | YORK&HUM | CO |
| 12673_8_79 | 2013 | 22 | 22 t032   | 1 | 0 t032  | N WEST   | NK |
| 12673_8_80 | 2013 | 88 | 88 t729   | 1 | 0 t729  | S EAST   | CO |
| 12673_8_81 | 2013 | 5  | 5 t002    | 1 | 0 t002  | S EAST   | NK |
| 12673_8_54 | 2013 | 1  | 1 t127    | 1 | 0 t127  | S WEST   | HO |
| 12673_8_57 | 2013 | 22 | 22 t032   | 1 | 0 t032  | E MIDS   | HO |
| 12673_8_58 | 2013 | 5  | 5 t002    | 1 | 0 t002  | EAST     | HO |
| 12673_8_59 | 2013 | 45 | 3846 t015 | 1 | 0 t015  | W MIDS   | HO |
| 12593_2_85 | 2013 | 22 | 22 t022   | 1 | 0 t022  | N EAST   | NK |
| 12673_8_45 | 2013 | 22 | 22 t032   | 1 | 0 t032  | E MIDS   | HO |
| 12673_8_46 | 2013 | 8  | 241 t030  | 1 | 0 t030  | N WEST   | HO |
| 12673_8_48 | 2013 | 22 | 22 t032   | 1 | 0 t032  | N WEST   | NK |
| 12673_8_47 | 2013 | 8  | 8 t032    | 1 | 0 t032  | S EAST   | HO |
| 12673_8_50 | 2013 | 30 | 36 t018   | 1 | 0 t018  | S EAST   | CO |
| 12673_8_53 | 2013 | 22 | 22 t005   | 1 | 1 t005  | S EAST   | HO |
| 12673_8_72 | 2013 | 22 | 22 t718   | 1 | 0 t718  | YORK&HUM | HO |
| 12673_8_73 | 2013 | 22 | 22 t032   | 1 | 0 t032  | N WEST   | HO |
| 12673_8_74 | 2013 | 97 | 97 t267   | 1 | 0 t267  | LONDON   | HO |
| 12593_2_87 | 2013 | 22 | 22 t492   | 1 | 0 t492  | S EAST   | HO |
| 12593_2_88 | 2012 | 22 | 22 t032   | 1 | 0 t032  | YORK&HUM | CO |
| 12593_2_89 | 2013 | 22 | 22 t1802  | 1 | 0 t1802 | YORK&HUM | CO |
| 12593_2_90 | 2013 | 30 | 36 t012   | 1 | 0 t012  | YORK&HUM | HO |
| 12593_2_86 | 2013 | 22 | 22 t022   | 1 | 0 t022  | YORK&HUM | CO |
